# Supplementary material for: NXC736 Attenuates Radiation-Induced Lung Fibrosis via Regulating NLRP3/IL-1β Signaling Pathway
Source: MDPI journal article supplement (doi:10.3390/ijms242216265), 2023-11-13
Supplement: s1 [file s1]

## Supplementary data

**Supplementary Figure S1.** The change of mice body weight. There was no significant difference between the groups. Data are expressed as the mean  $\pm$  standard deviation.

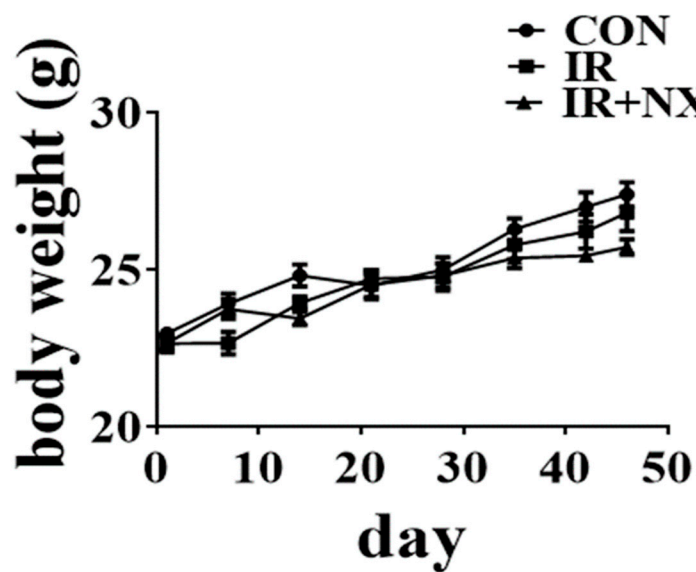

**Supplementary Figure S2.** The change in expression levels of cleaved caspase-1 and caspase-1. The cleaved caspase-1 was detected using the cleaved caspase-1 antibody purchased from Gentex in left panel. The Caspase-1 was detected using caspase-1 antibody purchased from Abcam in right panel. GAPDH was also detected to loading normalization.

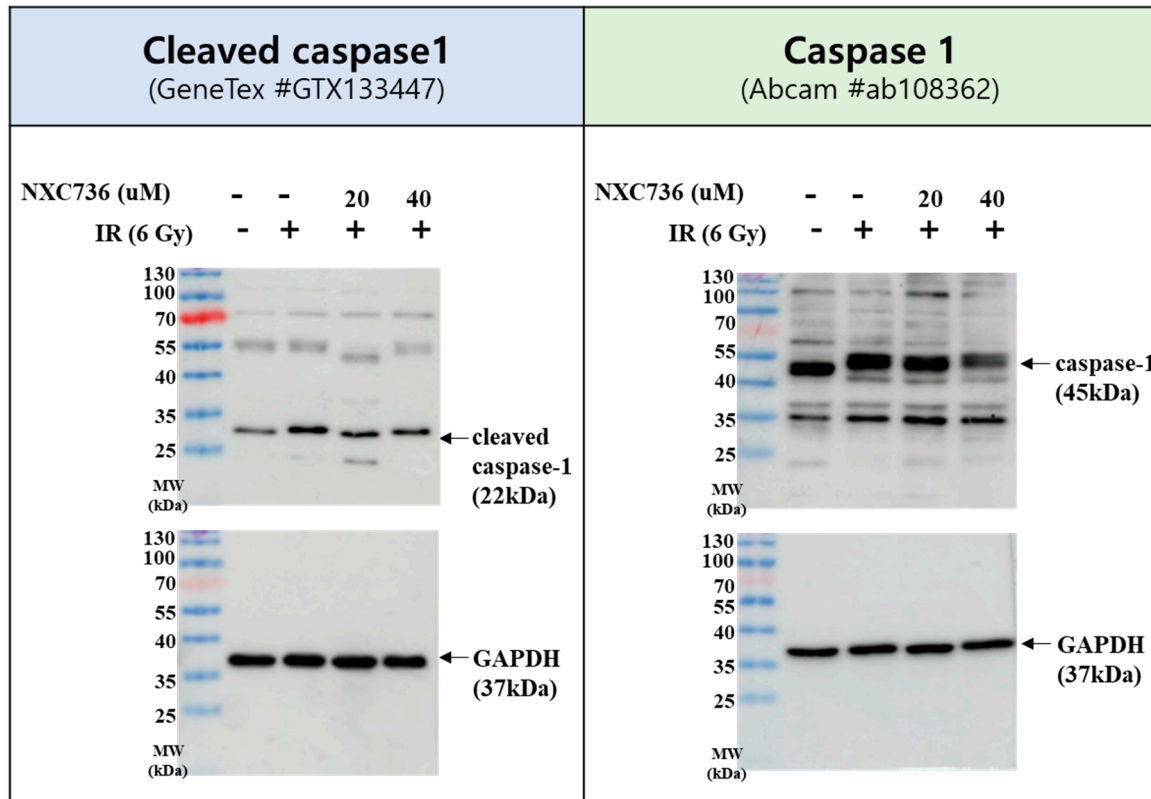

**Supplementary Figure S3.** L132 cells were irradiated with a dose of 6 Gy, harvested 24 hours later, and the expression of S1PR1 and S1PR4 at the mRNA level was measured using the q-PCR method. NXC736 altered the expression of S1PR1 and S1PR4 at the mRNA level. Data are expressed as the mean  $\pm$  standard deviation (\* $p < 0.05$ , \*\*\* $p < 0.001$ , and \*\*\*\* $p < 0.0001$ ).

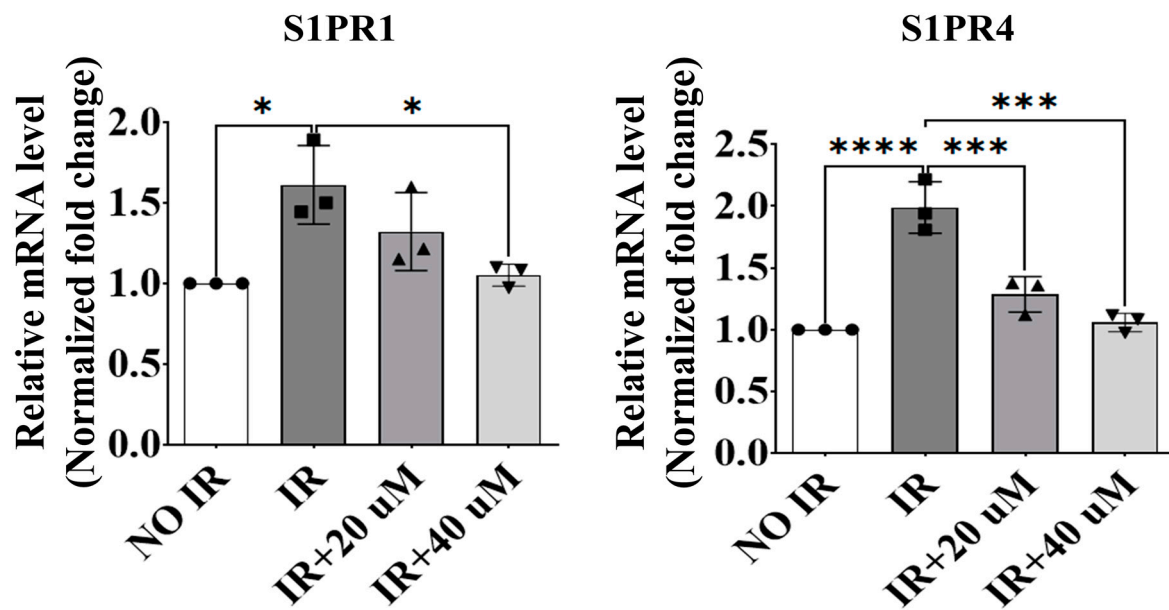

**Supplementary Figure S4.** Uncut Western blot image in Figure 3. Yellow box is original image in figure 3(C) and (D). The experiment was repeated 3 times ( $n = 3$ ; remarked #1, #2, #3). #1 is a representative image of this paper. The red-dashed box is the target antibody band being detected, and the size of the target antibody band can be confirmed using the size marker.

| Figure 3.                                                                                                                                   | Ab list               | #1 | #2 | #3 |
|---------------------------------------------------------------------------------------------------------------------------------------------|-----------------------|----|----|----|
| <p><b>Figure 3(C)</b></p> <p>IR (Gy) 0 3 6 9 12 15</p> <p>NLRP3 (118 kDa)</p> <p>GAPDH (37 kDa)</p>                                         | ① anti-NLRP3 (118kDa) |    |    |    |
|                                                                                                                                             | ② anti-NLRP3 (118kDa) |    |    |    |
|                                                                                                                                             | ③ anti-GAPDH (37kDa)  |    |    |    |
|                                                                                                                                             | ④ anti-APDH (37kDa)   |    |    |    |
| <p><b>Figure 3(D)</b></p> <p>IR (6 Gy) - + + + +</p> <p>IκBα (36 kDa)</p> <p>p-NFκB (65 kDa)</p> <p>NFκB (65 kDa)</p> <p>GAPDH (37 kDa)</p> | ① anti-IκBα (36 kDa)  |    |    |    |
|                                                                                                                                             | ② anti-IκBα (36 kDa)  |    |    |    |
|                                                                                                                                             | ③ anti-p-NFκB (65kDa) |    |    |    |
|                                                                                                                                             | ④ anti-NFκB (65kDa)   |    |    |    |
|                                                                                                                                             | ⑤ anti-GAPDH (37kDa)  |    |    |    |

**Supplementary Figure S5.** Western blot uncut image in Figure 4. Yellow box is original image in figure 4(D). The experiment was repeated 3 times ( $n = 3$ ; remarked #1, #2, #3). #1 is a representative image of this paper. The red-dashed box is the target antibody band being detected, and the size of the target antibody band can be confirmed using the size marker.

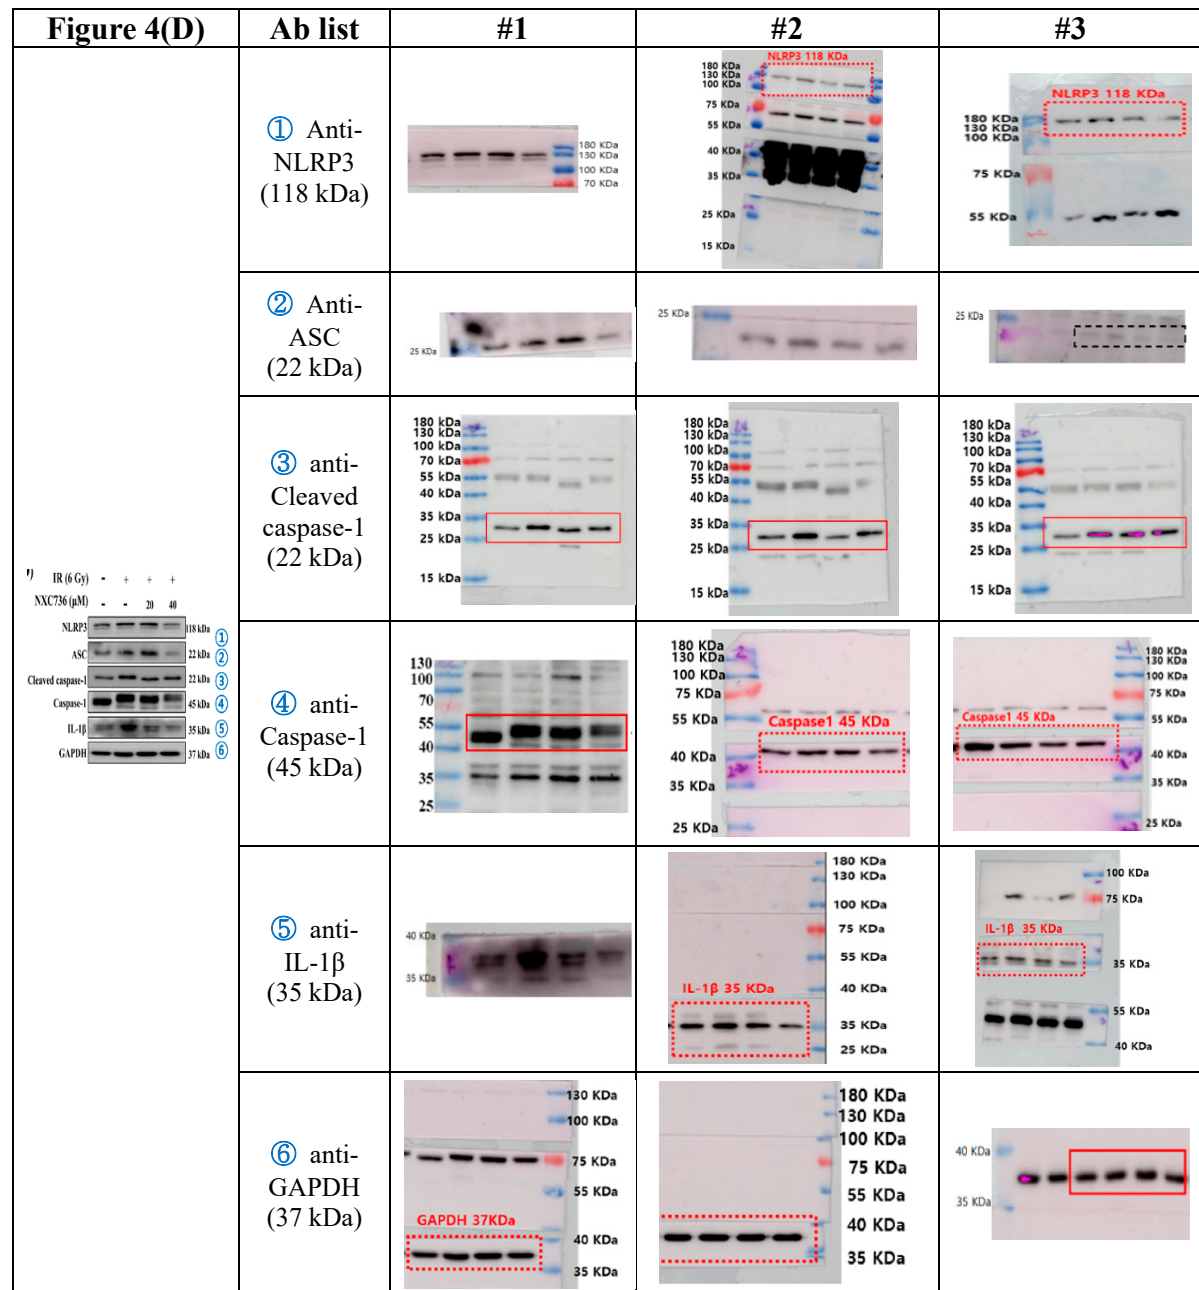

**Supplementary Figure S6.** Western blot uncut image in Figure 5. Yellow box is original image in figure 5(B). The experiment was repeated 3 times ( $n = 3$ ; remarked #1, #2, #3). #1 is a representative image of this paper. The red-dashed box is the target antibody band being detected, and the size of the target antibody band can be confirmed using the size marker.

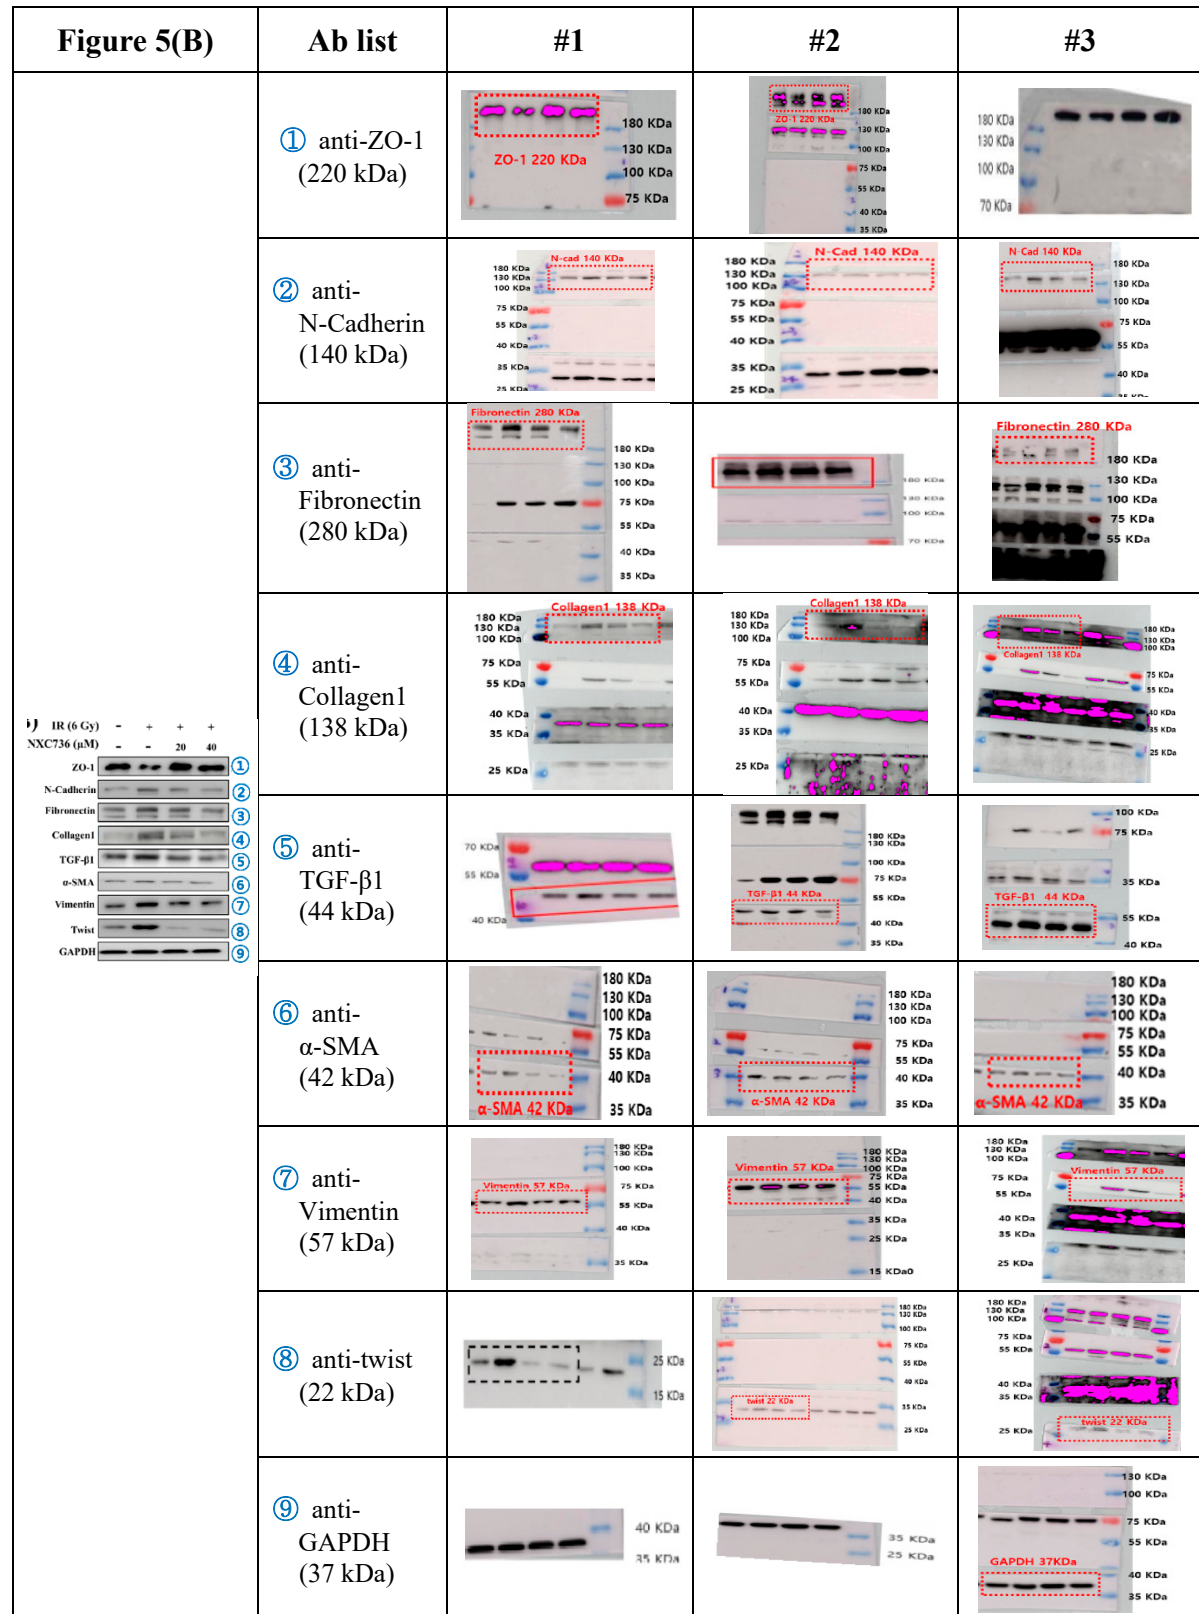



**Supplementary Figure S7.** Western blot uncut image in Figure 6(B). Yellow box is original image in figure 6(B). The experiment was repeated 3 times ( $n = 3$ ; remarked #1, #2, #3). #1 is a representative image of this paper. The red-dashed box is the target antibody band being detected, and the size of the target antibody band can be confirmed using the size marker.

| Figure 6(B)                                                                                                                                                                                                                                                                      | Ab list                   | #1                                                                                  | #2                                                                                  | #3                                                                                    |
|----------------------------------------------------------------------------------------------------------------------------------------------------------------------------------------------------------------------------------------------------------------------------------|---------------------------|-------------------------------------------------------------------------------------|-------------------------------------------------------------------------------------|---------------------------------------------------------------------------------------|
| 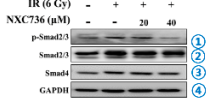 <p>IR (6 Gy)    -    +    +    +<br/> NXC736 (μM)   -    -    20    40</p> <p>① anti-p-Smad2/3 (60 kDa)<br/> ② anti-Smad2/3 (60 kDa)<br/> ③ anti-Smad4 (70 kDa)<br/> ④ anti-GAPDH (37 kDa)</p> | ① anti-p-Smad2/3 (60 kDa) |    |   |    |
|                                                                                                                                                                                                                                                                                  | ② anti-Smad2/3 (60 kDa)   |    |   |    |
|                                                                                                                                                                                                                                                                                  | ③ anti-Smad4 (70 kDa)     |    |   |    |
|                                                                                                                                                                                                                                                                                  | ④ anti-GAPDH (37 kDa)     |  |  |  |

**Supplementary Table S1.** The parameter description of the flexiVent™ system measurements

| Abbreviations | Parameter                            | Description                                                                                                                                                                                                                                                                                                                          |
|---------------|--------------------------------------|--------------------------------------------------------------------------------------------------------------------------------------------------------------------------------------------------------------------------------------------------------------------------------------------------------------------------------------|
| IC            | Inspiratory Capacity                 | Amount of air that can be inhaled after the end of a normal expiration.                                                                                                                                                                                                                                                              |
| Rrs           | Resistance of the respiratory system | Dynamic resistance quantitatively assesses the level of constriction in the lungs.                                                                                                                                                                                                                                                   |
| Crs           | Compliance of the respiratory system | Compliance (also known as dynamic compliance) describes the ease with which the respiratory system can be extended. In a subject with intact chest walls, it provides a characterisation of the overall elastic properties that the respiratory system needs to overcome during tidal breathing to move air in and out of the lungs. |
| Ers           | Elastance of the respiratory system  | Elastance captures the elastic stiffness of the respiratory system at the ventilation frequency. If measured under closed-chest conditions, it includes a contribution from the lung, the chest walls, and the airways. Elastance is the reciprocal of compliance and vice versa.                                                    |
| Rn            | Newtonian Resistance                 | Parameter of the Constant Phase Model which represents the resistance of the central or conducting airways.                                                                                                                                                                                                                          |
| G             | Tissue Damping                       | Parameter of the Constant Phase Model closely related to tissue resistance and reflects the energy dissipation in the alveoli.                                                                                                                                                                                                       |
| H             | Tissue Elastance                     | Parameter of the Constant Phase Model closely related to tissue elastance and reflects the energy conservation in the alveoli.                                                                                                                                                                                                       |
| Cst           | Quasi-static Compliance              | Quasi-static compliance is a classic parameter extracted from a PV curve. If measured under closed-chest conditions, it reflects the intrinsic elastic properties of the respiratory system (i.e. lung+chest wall) at rest.                                                                                                          |



**Supplementary Table S2.** Primer sequences used for real-time polymerase chain reaction.

| Gene          | Forward (5' →3')         | Reverse (5' →3')        |
|---------------|--------------------------|-------------------------|
| TNF- $\alpha$ | GGAGAAGGGTGACCGACT       | CTGCCCAGACTCGGCAA       |
| IL-6          | GTCAGGGGTGGTTATTGC       | AGTGAGGAACAAGCCAGA      |
| IL-18         | CAGCCTAGAGGTATGGCTGT     | TCATGTCCTGGGACACTTCTC   |
| TGF- $\beta$  | GCAGCACGTGGAGCTGTA       | CAGCCGGTTGCTGAGGTA      |
| NLRP3         | CACCTGTTGTGCAATCTGAAG    | GCAAGATCCTGACAACATGC    |
| IL-1 $\beta$  | TACCTGTCCTGCGTGTTGAAA    | CTGCTTGAGAGGTGCTGATGT   |
| S1PR1         | TATCAGCGCGGACAAGGAGAACAG | ATAGGCAGGCCACCCAGGATGAG |
| S1PR4         | GACGCTGGGTCTACTATTGCC    | CCTCCCGTAGGAACCACTG     |

Cycling conditions: Denature: 95°C for 30 s, 95°C for 4 min, followed by 35 cycles of 95°C for 10 s, 55–61°C (shown in column of Annealing Temperature) for 15 s and 72°C for 15 s
